# Supplementary material for: Effect of Recurrent Salt and Drought Stress Treatments on the Endangered Halophyte Limonium angustebracteatum Erben
Source: MDPI journal article supplement (doi:10.3390/plants12010191), 2023-01-03
Supplement: s1 [file s1]

**Table S1:** Two-way analysis of variance (ANOVA) of stress treatments (Treat), harvesting time (Time), and their interactions (Treat x Time) for the 24 measured traits: total leaf number (LN), wilted leaf percentage (%WL), specific leaf area (SLA), leaf fresh weight (LFW), leaf dry weight (LDW), leaf water content (LWC), root water content (RWC), proline (PRO), total soluble sugars (TSS), malondialdehyde (MDA), hydrogen peroxide (H<sub>2</sub>O<sub>2</sub>), total phenolic compounds (TPC), total flavonoids (TF), chlorophyll a (Chl a), chlorophyll b (Chl b), carotenoids (Car), root sodium concentration (Na(r)), leaf sodium concentration (Na(l)), root chloride concentration (Cl(r)), leaf chloride concentration (Cl(l)), root potassium concentration (K(r)), leaf potassium concentration (K(l)), root calcium concentration (Ca(r)), leaf calcium concentration (Ca(l)). Significance codes: ns, (+), \*, \*\*, and \*\*\* mean, respectively, not significant and significant at p ≤ 0.1, p ≤ 0.05, p ≤ 0.01 and p ≤ 0.001

| Treat        | LN          | WL             | SLA         | LFW         | LDW         | LWC            | RWC            | PRO            | TSS            | MDA            | H <sub>2</sub> O <sub>2</sub> | TPC            | TF             | Chl a         | Chl b          | Car           | Na(r)         | Na(s)          | Cl(r)          | Cl(l)         | K(r)           | K(l)        | Ca(r)          | Ca(l)          |
|--------------|-------------|----------------|-------------|-------------|-------------|----------------|----------------|----------------|----------------|----------------|-------------------------------|----------------|----------------|---------------|----------------|---------------|---------------|----------------|----------------|---------------|----------------|-------------|----------------|----------------|
| C            | 17          | 12 c           | 24.34       | 5.16 ab     | 1.74        | 66.8 a         | 60.2 a         | 0.63 b         | 55.2 b         | 45.2 b         | 9.0                           | 8.11 c         | 0.52 b         | 2.26 a        | 0.71 a         | 0.73          | 183.0 b       | 599.5 c        | 449.2 c        | 774 c         | 124.9 b        | 263.3       | 27.4 c         | 99.5 bc        |
| 0.5 M NaCl   | 18          | 18 b           | 31.26       | 5.24 a      | 1.76        | 66.3 a         | 53.5 b         | 30.9 a         | 57.4 ab        | 73.8 a         | 12.4                          | 13.3 b         | 0.96 a         | 1.97 ab       | 0.51 b         | 0.66          | 517.5 ab      | 989.0 b        | 906.2 b        | 1203.3 b      | 141.6 ab       | 274.9       | 55.1 b         | 110.4 b        |
| 1 M NaCl     | 16          | 24 a           | 31.72       | 4.87 ab     | 1.51        | 69.1 a         | 49.0 b         | 56.9 a         | 67.2 a         | 101.4 a        | 13.6                          | 15.6 a         | 1.10 a         | 2.12 a        | 0.57 ab        | 0.67          | 1027.2 a      | 1366.1 a       | 1526.4 a       | 2423.5 a      | 119.5 b        | 278.8       | 88.6 a         | 156.1 a        |
| WS           | 15          | 27 a           | 33.98       | 3.88 b      | 1.72        | 52.4 b         | 42.1 c         | 103.4 a        | 39.5 c         | 148.0 a        | 14.2                          | 12.8 b         | 0.92 a         | 1.54b         | 0.39 c         | 0.54          | 180.2 b       | 650.8 c        | 578.2 bc       | 810.5 c       | 163.9 a        | 293.5       | 25.9 c         | 77.4 c         |
| p            | 0.314<br>ns | 1.2e-06<br>*** | 0.542<br>ns | 0.030<br>*  | 0.690<br>ns | 6.6e-08<br>*** | 4.7e-09<br>*** | 3.7e-06<br>*** | 5.1e-06<br>*** | 0.0001<br>**   | 1.4e-05<br>***                | 7.9e-15<br>*** | 3.4e-06<br>*** | 0.002<br>**   | 8.1e-07<br>*** | 0.313<br>ns   | 0.022<br>*    | 9.6e-12<br>*** | 2.9e-09<br>*** | 2.0e-5<br>*** | 0.007<br>**    | 0.806<br>ns | 7.2e-15<br>*** | 1.3e-08<br>*** |
| Time         |             |                |             |             |             |                |                |                |                |                |                               |                |                |               |                |               |               |                |                |               |                |             |                |                |
| T1           | 17          | 31             | 25.08       | 4.46        | 1.84        | 53.7 b         | 38.2 c         | 90.1 a         | 61.6 a         | 151.1 a        | 14.3                          | 13.8 a         | 1.21 a         | 1.58 b        | 0.48 b         | 0.56 b        | 657.5 a       | 997.8 a        | 1085.4 a       | 1782.1 a      | 173.3 a        | 325.4 a     | 59.9 a         | 131.2 a        |
| T2           | 18          | 33             | 29.38       | 4.92        | 1.63        | 67.9 a         | 64.3 a         | 1.50 b         | 44.5 b         | 55.1 c         | 10.9                          | 10.6 b         | 0.54 c         | 2.37 a        | 0.66 a         | 0.8 a         | 158.4 b       | 627.1 b        | 417.8 b        | 861.3 b       | 96.9 c         | 248.9 b     | 25.3 b         | 91.1 b         |
| T3           | 21          | 23             | 36.52       | 4.98        | 1.58        | 69.4 a         | 51.1 b         | 52.3 a         | 58.4 a         | 70.0 b         | 11.6                          | 13.0 a         | 0.88 b         | 1.97 b        | 0.49 b         | 0.59 b        | 615.1 a       | 1079.1 a       | 1091.7 a       | 1265.1 a      | 142.3 b        | 258.6 b     | 62.6 a         | 110.3 b        |
| p            | 0.075<br>ns | 0.110<br>ns    | 0.169<br>ns | 0.405<br>ns | 0.423<br>ns | 3.1e-09<br>*** | 1.8e-15<br>*** | 0.009<br>**    | 0.0001<br>***  | 0.0006<br>**   | 0.025<br>*                    | 1.4e-07<br>*** | 4.0e-09<br>*** | 0.0001<br>*** | 0.0001<br>***  | 0.0008<br>*** | 0.001<br>**   | 1.3e-07<br>*** | 3.6e-07<br>*** | 0.071<br>(+)  | 3.2e-07<br>*** | 0.002<br>** | 1.6e-10<br>*** | 0.0001<br>***  |
| Treat x Time |             |                |             |             |             |                |                |                |                |                |                               |                |                |               |                |               |               |                |                |               |                |             |                |                |
| C-T1         | 17          | 13 c           | 20.78       | 5.13        | 1.73        | 68.5 a         | 57.4 ab        | 0.58 f         | 57.3 abcd      | 46 f           | 8.44 g                        | 7.91 f         | 0.55 d         | 2.49 ab       | 0.78 a         | 0.79 ab       | 204.6 bcd     | 498.4 d        | 455.0 d        | 627.3 e       | 119.9 bcd      | 260.7 bc    | 30.9 c         | 93.9 bc        |
| 0.5M-T1      | 19          | 32 b           | 37.14       | 5.02        | 1.93        | 62.3 a         | 42.5 cd        | 43.3 c         | 69.4 ab        | 102 bc         | 14.7 ab                       | 15.7 abc       | 1.51 a         | 1.60 bcd      | 0.48 bc        | 0.56 de       | 817.5 ab      | 1040.2 bc      | 1305.9 bc      | 1405.3 ab     | 169 abc        | 340.3 ab    | 75.1 b         | 146.9 ab       |
| 1M-T1        | 16          | 41 a           | 16.90       | 5.11        | 1.70        | 66.5 a         | 37.3 d         | 85.0 b         | 78.2 a         | 156.2 ab       | 14.5 b                        | 18.4 a         | 1.46 ab        | 1.72 abc      | 0.53 abc       | 0.63 bcde     | 1390.9 a      | 1807.5 a       | 2014.4 ab      | 4348.5 a      | 187.5 ab       | 357.4 a     | 109.0 a        | 199.4 a        |
| WS-T1        | 16          | 38 a           | 25.48       | 2.58        | 1.99        | 17.7 b         | 15.7 e         | 231.7 a        | 41.5 cd        | 300.4 a        | 19.6 a                        | 13.1 bcd       | 1.32 abc       | 0.53 d        | 0.15 d         | 0.24 f        | 216.9 bcd     | 645.0 cd       | 566.4 cd       | 747.3 de      | 217.1 a        | 343.3 ab    | 24.7 c         | 84.6 c         |
| C-T2         | 19          | 22 bc          | 27.11       | 5.21        | 1.83        | 64.3 a         | 64.5 a         | 0.68 f         | 55.3 abcd      | 50.5 f         | 8.95 fg                       | 8.18 ef        | 0.52 d         | 2.16 abc      | 0.67 ab        | 0.72 abcd     | 171.9 cd      | 534.4 d        | 441.7 d        | 776.0 de      | 125.1 bcd      | 262.9 bc    | 25.0 c         | 93.9 bc        |
| 0.5M-T2      | 21          | 22 bc          | 25.46       | 4.78        | 1.58        | 66.7 a         | 63.4 a         | 2.73 d         | 41.3 cd        | 41.4 f         | 10.4 ef                       | 11.4 de        | 0.42 d         | 2.05abc       | 0.56 abc       | 0.8 a         | 148.3 d       | 589.7 cd       | 363.2 d        | 790.8 de      | 94.0 cd        | 239.7 c     | 21.6 c         | 83.3 c         |
| 1M-T2        | 15          | 38 a           | 25.37       | 4.90        | 1.39        | 71.8 a         | 62.4 a         | 1.41 e         | 46.9 bcd       | 64.0 e         | 13.2 bc                       | 12.5 cd        | 0.58 d         | 2.48 ab       | 0.68 ab        | 0.77 abc      | 144.7 d       | 783.9 cd       | 389.5 d        | 1129.4 bc     | 56.3d          | 225.2 c     | 23.5 c         | 121.4 bc       |
| WS-T2        | 16          | 50 a           | 39.56       | 4.78        | 1.73        | 68.8 a         | 66.9 a         | 1.18 e         | 34.4 d         | 64.5 e         | 11.1 de                       | 10.3 def       | 0.63 d         | 2.78 a        | 0.72 ab        | 0.92 a        | 168.7 cd      | 600.3 cd       | 476.9 d        | 748.8 de      | 112.1 bcd      | 267.9 bc    | 31.2 c         | 65.8 c         |
| C-T3         | 19          | 21 bc          | 25.12       | 5.14        | 1.66        | 67.6 a         | 58.6 ab        | 0.62 f         | 53 abcd        | 38.9 f         | 9.45 fg                       | 8.2 ef         | 0.50 d         | 2.14 abc      | 0.69 ab        | 0.67 bcde     | 172.6 cd      | 765.7 cd       | 450.9 d        | 918.6 cde     | 129.9 bcd      | 266.3 bc    | 26.4 c         | 110.6 bc       |
| 0.5M-T3      | 20          | 26 bc          | 31.17       | 5.92        | 1.78        | 70.0 a         | 54.7 abc       | 46.6 c         | 61.5 abc       | 77.9 d         | 11.9 cd                       | 12.8 bcd       | 0.94 bcd       | 2.27 abc      | 0.49 bc        | 0.62 bcde     | 586.6 bc      | 1337 ab        | 1049.5 cd      | 1413.6 b      | 162.0 abc      | 244.7 c     | 68.7 b         | 101.1 bc       |
| 1M-T3        | 28          | 19 bc          | 52.89       | 4.60        | 1.44        | 69.1 a         | 47.3 bcd       | 84.4 b         | 76.6 a         | 84.1 cd        | 13.1 bc                       | 16.0 ab        | 1.25 abc       | 2.18 abc      | 0.49 bc        | 0.6 cde       | 1546.1 a      | 1506.8 ab      | 2175.3 a       | 1792.6 ab     | 114.7 bcd      | 253.9 c     | 133.3 a        | 147.7 ab       |
| WS-T3        | 18          | 26 bc          | 36.90       | 4.27        | 1.45        | 70.9 a         | 43.9 cd        | 77.4 b         | 42.7 bcd       | 79.2 d         | 11.9 cde                      | 14.9 bc        | 0.82 cd        | 1.3 cd        | 0.31 cd        | 0.45 ef       | 155.0 d       | 707.0 cd       | 691.2 cd       | 935.4 cd      | 162.5 abc      | 269.4 bc    | 21.9 c         | 81.9 c         |
| p            | 0.165<br>ns | 4.9e-06<br>*** | 0.207<br>ns | 0.257<br>ns | 0.952<br>ns | 1.7e-11<br>*** | 9.7e-08<br>*** | 4.3e-06<br>*** | 0.04<br>*      | 1.6e-05<br>*** | 4.2e-05<br>***                | 0.0001<br>**   | 0.0012<br>**   | 0.0001<br>*** | 8.4e-05<br>*** | 0.0018<br>**  | 0.0008<br>*** | 2.4e-05<br>*** | 1.6e-05<br>*** | 0.0003<br>*** | 0.0048<br>**   | 0.050<br>*  | 1.4e-10<br>*** | 0.019<br>*     |

**Table S2:** Correlation coefficients between the first three PCs and the 24 measured variables: total leaf number (LN), wilted leaf percentage (%WL), specific leaf area (SLA), leaf fresh weight (LFW), leaf dry weight (LDW), leaf water content (LWC), root water content (RWC), chlorophyll a (Chl a), chlorophyll b (Chl b), carotenoids (Car), root sodium concentration (Na(r)), leaf sodium concentration (Na(l)), root chloride concentration (Cl(r)), leaf chloride concentration (Cl(l)), root potassium concentration (K(r)), leaf potassium concentration (K(l)), root calcium concentration (Ca(r)), leaf calcium concentration (Ca(l)), proline (PRO), total soluble sugars (TSS), malondialdehyde (MDA), hydrogen peroxide (H<sub>2</sub>O<sub>2</sub>), total phenolic compounds (TPC), and total flavonoids (TF). The correlations coefficients are accompanied by their relative p values

|                               | PCAstress1     |          |                |          |                |          | PCAstress2     |          |                |          |                |       |
|-------------------------------|----------------|----------|----------------|----------|----------------|----------|----------------|----------|----------------|----------|----------------|-------|
|                               | PC1            |          | PC2            |          | PC3            |          | PC1            |          | PC2            |          | PC3            |       |
|                               | R <sup>2</sup> | p        | R <sup>2</sup> | p     |
| <i>Quantitative variables</i> |                |          |                |          |                |          |                |          |                |          |                |       |
| %WL                           | -0.44          | 0.090    | 0.50           | 0.048    | 0.64           | 0.008    | -0.23          | 0.383    | -0.34          | 0.202    | 0.42           | 0.109 |
| Ca(l)                         | 0.26           | 0.327    | 0.87           | 1.05E-05 | -0.10          | 0.723    | 0.50           | 0.049    | 0.54           | 0.032    | -0.14          | 0.617 |
| Ca(r)                         | 0.30           | 0.267    | 0.93           | 1.43E-07 | -0.04          | 0.889    | 0.91           | 8.11E-07 | 0.37           | 0.153    | 0.04           | 0.895 |
| Car                           | 0.91           | 1.28E-06 | 0.01           | 0.977    | 0.02           | 0.956    | -0.13          | 0.623    | 0.63           | 0.009    | 0.43           | 0.094 |
| Chl.a                         | 0.92           | 4.29E-07 | -0.07          | 0.785    | 0.06           | 0.827    | 0.11           | 0.677    | 0.74           | 0.001    | 0.40           | 0.129 |
| Chl.b                         | 0.88           | 6.46E-06 | -0.11          | 0.680    | 0.12           | 0.661    | -0.29          | 0.276    | 0.80           | 0.000    | -0.41          | 0.119 |
| Cl(r)                         | 0.17           | 0.522    | 0.90           | 1.61E-06 | -0.10          | 0.706    | 0.85           | 2.76E-05 | 0.18           | 0.515    | 0.08           | 0.761 |
| Cl(s)                         | 0.10           | 0.713    | 0.79           | 2.98E-04 | -0.19          | 0.474    | 0.87           | 1.26E-05 | 0.28           | 0.285    | -0.01          | 0.959 |
| H <sub>2</sub> O <sub>2</sub> | -0.91          | 1.32E-06 | 0.27           | 0.309    | -0.03          | 0.901    | 0.75           | 8.40E-04 | -0.19          | 0.473    | 0.33           | 0.216 |
| K(l)                          | -0.44          | 0.090    | 0.48           | 0.061    | 0.06           | 0.836    | -0.24          | 0.378    | -0.18          | 0.503    | -0.02          | 0.928 |
| K(r)                          | -0.77          | 4.22E-04 | 0.31           | 0.243    | -0.23          | 0.401    | -0.31          | 0.250    | -0.37          | 0.157    | 0.49           | 0.055 |
| LDW                           | -0.12          | 0.651    | -0.09          | 0.753    | -0.39          | 0.134    | -0.39          | 0.137    | 0.23           | 0.389    | 0.55           | 0.026 |
| LFW                           | 0.69           | 3.07E-03 | 0.21           | 0.445    | -0.24          | 0.375    | -0.27          | 0.320    | 0.33           | 0.207    | 0.50           | 0.048 |
| LN                            | -0.26          | 0.329    | 0.11           | 0.679    | 0.83           | 8.05E-05 | 0.53           | 0.034    | -0.03          | 0.920    | -0.52          | 0.037 |
| LWC                           | 0.91           | 8.41E-07 | 0.29           | 0.279    | 0.13           | 0.620    | 0.22           | 0.419    | -0.36          | 0.169    | -0.07          | 0.783 |
| MDA                           | -0.93          | 2.65E-07 | 0.09           | 0.743    | -0.17          | 0.519    | 0.71           | 0.002    | -0.41          | 0.112    | 0.49           | 0.053 |
| Na(l)                         | 0.09           | 0.742    | 0.93           | 1.78E-07 | -0.06          | 0.814    | 0.82           | 9.41E-05 | 0.37           | 0.157    | 0.10           | 0.717 |
| Na(r)                         | 0.23           | 0.401    | 0.96           | 3.36E-09 | -0.02          | 0.930    | 0.92           | 5.71E-07 | 0.34           | 0.203    | -0.03          | 0.912 |
| PRO                           | -0.92          | 3.45E-07 | 0.00           | 0.994    | -0.10          | 0.716    | 0.74           | 0.001    | -0.57          | 0.022    | 0.14           | 0.597 |
| RWC                           | 0.94           | 1.03E-07 | -0.14          | 0.595    | 0.15           | 0.569    | -0.40          | 0.121    | 0.64           | 0.008    | 0.00           | 0.991 |
| SLA                           | -0.11          | 0.697    | 0.04           | 0.884    | 0.93           | 1.19E-07 | 0.64           | 0.007    | -0.13          | 0.635    | -0.58          | 0.018 |
| TF                            | -0.39          | 0.137    | 0.64           | 0.007    | 0.13           | 0.641    | 0.93           | 1.21E-07 | -0.09          | 0.750    | 0.00           | 1.000 |
| TPC                           | -0.21          | 0.425    | 0.92           | 5.33E-07 | 0.03           | 0.909    | 0.73           | 0.001    | -0.48          | 0.059    | 0.27           | 0.319 |
| TSS                           | 0.48           | 0.057    | 0.66           | 0.005    | -0.05          | 0.865    | 0.56           | 0.023    | 0.50           | 0.048    | 0.32           | 0.226 |
| <i>Categorical variables</i>  |                |          |                |          |                |          |                |          |                |          |                |       |
| trt=C                         | 3.37           | 0.006    | -3.26          | 0.002967 | -0.11          | 0.885391 | -3.56          | 0.003    | 1.95           | 0.032    | -1.10642       | 0.135 |
| trt=L                         | 0.47           | 0.738    | 1.04           | 0.410241 | 1.13           | 0.104169 | 0.07           | 0.963    | 0.48           | 0.622    | 1.373669       | 0.057 |
| trt=H                         | 0.83           | 0.554    | 3.80           | 0.000156 | -0.75          | 0.295438 | 4.29           | 6.25E-05 | 1.01           | 0.298    | -0.17172       | 0.824 |
| trt=WS                        | -4.66          | 1.89E-06 | -1.58          | 0.202734 | -0.28          | 0.704006 | -0.80          | 0.566    | -3.45          | 2.08E-08 | -0.09553       | 0.901 |

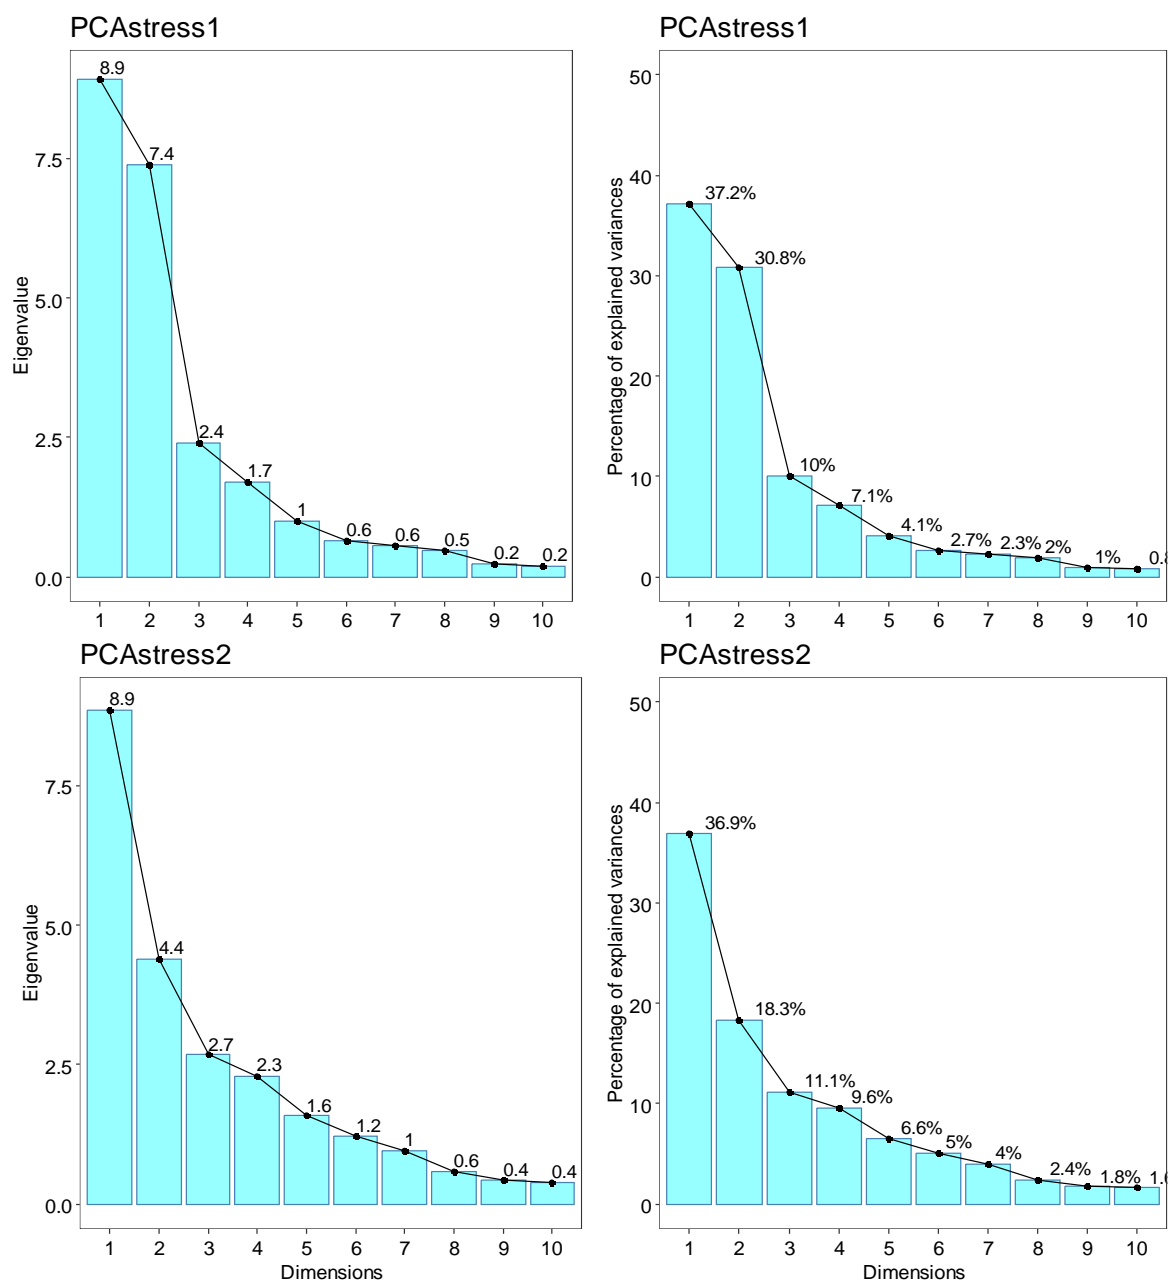

**Figure S1:** Eigen analysis of PCAstress1 and PCAstress2 correlation matrix
